1 **Title: The WOPR family protein Ryp1 is a key regulator of gene expression, development,**  
2 **and virulence in the thermally dimorphic fungal pathogen *Coccidioides posadasii***

3 M. Alejandra Mandel<sup>1,2\*</sup>, Sinem Beyhan<sup>3,4,5\*</sup>, Mark Voorhies<sup>3</sup>, Lisa F. Shubitz<sup>2</sup>, John N.  
4 Galgiani<sup>2</sup>, Marc J.Orbach<sup>1,2#</sup>, Anita Sil<sup>3#</sup>

5 \*Co-first authors

6 #Co-corresponding authors

7

8 **Affiliations:**

9 <sup>1</sup>School of Plant Sciences, University of Arizona, Tucson, AZ 85721, USA

10 <sup>2</sup>Valley Fever Center for Excellence, The University of Arizona, Tucson, AZ 85724, USA

11 <sup>3</sup>Department of Microbiology and Immunology, University of California San Francisco, San  
12 Francisco, CA 94143, USA

13 <sup>4</sup>Current address: Department of Infectious Diseases, J. Craig Venter Institute, La Jolla, CA 92037,  
14 USA

15 <sup>5</sup>Current address: Department of Medicine, University of California San Diego, La Jolla, CA 92037,  
16 USA

17

18 Running title: Ryp1 regulates spherule development and virulence in *C. posadasii*

19

20 Keywords: *Coccidioides posadasii*, morphology, virulence, dimorphic fungi

21

22 Correspondence: [anita.sil@ucsf.edu](mailto:anita.sil@ucsf.edu), [orbachmj@arizona.edu](mailto:orbachmj@arizona.edu)

## 23 **Abstract**

24 *Coccidioides* spp. are mammalian fungal pathogens endemic to the southwestern US and other  
25 desert regions of Mexico, central and South America, with the bulk of US infections occurring in  
26 California and Arizona. In the soil, *Coccidioides* grows in a hyphal form that differentiates into 3-  
27 5 micron asexual spores (arthroconidia). When arthroconidia are inhaled by mammals they  
28 undergo a unique developmental transition from polar hyphal growth to isotropic expansion with  
29 multiple rounds of nuclear division, prior to segmentation, forming large spherules filled with  
30 endospores. Very little is understood about the molecular basis of spherule formation. Here we  
31 characterize the role of the conserved transcription factor Ryp1 in *Coccidioides* development. We  
32 show that *Coccidioides*  $\Delta ryp1$  mutants have altered colony morphology under hypha-promoting  
33 conditions and are unable to form mature spherules under spherule-promoting conditions. We  
34 analyze the transcriptional profile of wild-type and  $\Delta ryp1$  mutant cells under hypha- and spherule-  
35 promoting conditions, thereby defining a set of hypha- or spherule-enriched transcripts  
36 (“morphology-regulated” genes) that are dependent on Ryp1 for their expression. Forty percent  
37 of morphology-regulated expression is Ryp1-dependent, indicating that Ryp1 plays a dual role in  
38 both hyphal and spherule development. Ryp1-dependent transcripts include key virulence factors  
39 such as SOWgp, which encodes the spherule outer wall glycoprotein. Concordant with its role in  
40 spherule development, we find that the  $\Delta ryp1$  mutant is completely avirulent in the mouse model  
41 of coccidioidomycosis, indicating that Ryp1-dependent pathways are essential for the ability of  
42 *Coccidioides* to cause disease. Vaccination of C57BL/6 mice with live  $\Delta ryp1$  spores does not  
43 provide any protection from lethal *C. posadasii* intranasal infection, consistent with our findings  
44 that the  $\Delta ryp1$  mutant fails to make mature spherules and likely does not express key antigens  
45 required for effective vaccination. Taken together, this work identifies the first transcription factor  
46 that drives mature spherulation and virulence in *Coccidioides*.

47

## 48 **Author Summary**

49 *Coccidioides* species, *C. immitis* and *C. posadasii*, are dimorphic fungal pathogens that commonly  
50 infect humans in North, Central, and South America, causing the respiratory fungal disease known  
51 as Valley Fever. *Coccidioides* grows as hyphae in the soil and differentiates into unique structures  
52 called spherules in the mammalian host. Spherules expand and internally divide to form  
53 endospores, which are released to facilitate dissemination of the pathogen within the host. The  
54 mechanisms underlying spherule differentiation remain largely unknown. In this study, we  
55 generated knockout mutants ( $\Delta ryp1$ ) of the conserved transcription factor Ryp1 in *C. posadasii*  
56 and characterized its role in spherule formation and virulence. We found that Ryp1 is required for  
57 the formation of mature spherules and colonization of mouse lungs. Transcriptional profiling of  
58 the  $\Delta ryp1$  mutant and the wild-type strain shows that Ryp1 regulates the expression of a subset  
59 of the transcripts that are either upregulated in wild-type spherules or in wild-type hyphae. These  
60 findings suggest that Ryp1 has a dual role in regulating morphology and virulence under host  
61 conditions as well as regulating genes involved in hyphal growth in the environment.

## 62 **Introduction**

63 *Coccidioides spp.* are fungal pathogens endemic to California, Arizona, and other desert  
64 regions in the Americas [1]. *Coccidioides* infects otherwise healthy individuals when they inhale  
65 spores from the soil. The prevalence of *Coccidioides* infection rose 9-fold between 1998 and 2011  
66 and has continued to spike, with incidence now at an all-time high [2]. Elegant observational  
67 studies of *Coccidioides* have established its complex life cycle, its disease etiology, and its  
68 interaction with the mammalian immune system. The molecular basis of these attributes remains  
69 poorly understood, although candidate-based studies have implicated a handful of *Coccidioides*  
70 genes in growth and virulence.

71 *Coccidioides* is one of a group of thermally dimorphic fungal pathogens that grow in a  
72 sporulating hyphal form in the soil [3]. Upon introduction into the mammalian host, spores undergo  
73 differentiation into a parasitic form. Indeed, the defining characteristic of *Coccidioides*  
74 pathogenesis is development of the spore (arthroconidium) into a multicellular structure called the  
75 spherule [1,4]. In spherule development, instead of germinating and growing as polar hyphae, the  
76 arthroconidium undergoes isotropic enlargement in the mammalian lung with multiple rounds of  
77 mitosis prior to formation of internal spores (endospores) resulting in a 60 to 100 µm micron multi-  
78 cellular spherule, encased by a spherule outer wall [5]. If a spherule ruptures, endospores are  
79 released and can re-initiate the spherule cycle, either locally or following dissemination to other  
80 sites within the host. Known virulence genes in *Coccidioides* are expressed concomitant with  
81 spherule development [6–9]. One critical unanswered question in *Coccidioides* biology is the  
82 nature of the regulatory network that drives spherulation and virulence.

83 To identify putative regulators of spherulation, we assessed the role of the conserved  
84 fungal transcription factor, Ryp1, that is involved in development of the parasitic form in response  
85 to temperature for the other thermally dimorphic fungi. We had previously shown that the WOPR  
86 transcription factor Ryp1 is a master regulator that is required for the formation of the host form  
87 in the thermally dimorphic fungal pathogen *Histoplasma* [10,11]. Additionally, Ryp1 is a master  
88 regulator of gene expression in response to temperature in *Histoplasma*, as it is required for the  
89 vast majority of the gene expression program at 37°C [10,11]. Investigating the role of Ryp1 in  
90 *Coccidioides* was particularly compelling since Ryp1 orthologs are found throughout the fungal  
91 kingdom and are required for key developmental transitions in numerous fungi [12–16]. For  
92 example, the *Candida albicans* ortholog Wor1 regulates cell-type specification by driving the  
93 switch from “white” cells to “opaque” cells [17,18].

94 Here we deleted the *RYP1* gene in *Coccidioides posadasii* and showed that the resultant  
95 mutant is unable to undergo mature spherulation. We used RNA-seq to show that Ryp1 has a

96 role in gene expression in both spherules and hyphae. The  $\Delta ryp1$  mutant failed to express the  
97 normal complement of hypha-enriched transcripts, and most notably, the immature  $\Delta ryp1$   
98 spherules expressed only a subset of normal spherule-enriched genes, consistent with their  
99 inability to fully differentiate. The  $\Delta ryp1$  mutant was completely avirulent in the mouse model of  
100 *Coccidioides* infection, demonstrating that the Ryp1 transcription factor is a key regulator that  
101 links the ability to form mature spherules and the expression of critical virulence traits.

102

## 103 **Results**

### 104 **Deletion of *Coccidioides posadasii* RYP1**

105 To define potential regulators of *Coccidioides* parasitic phase development, we identified  
106 the *C. posadasii* ortholog of the conserved regulator of fungal development, *RYP1*, based on  
107 similarity to the *H. capsulatum* Ryp1 protein [10]. Ryp1 is a member of the WOPR family of  
108 transcription factors. The *C. posadasii* strain Silveira *RYP1* gene, CPSG\_00528, encodes a 404  
109 amino acid protein that is 68% similar to the 487 *H. capsulatum* *RYP1* protein [10], with 84%  
110 identity and 91% similarity over the N-terminal half of the protein including the WOPRa and  
111 WOPRb regions and the putative nuclear localization signal). To determine the role of *RYP1* in  
112 the *C. posadasii* life cycle, gene replacement strains were made via *Agrobacterium* transformation  
113 [19,20]. Transformed lines were screened for homologous recombination of a deletion construct  
114 where the *E. coli* *hphB* gene was cloned between 1.2 kb 5' and 3' flanking regions of the *RYP1*  
115 gene, using an approach similar to that used for creation of the  $\Delta cps1$  strain [19]. A total of 40  
116 transformed lines were generated between two transformations with 42% being *RYP1* gene  
117 replacements as analyzed by DNA hybridization for the first set of transformants and PCR for the  
118 second set (data not shown). The *RYP1* gene replacement strains ( $\Delta ryp1$ ) have a single insertion  
119 of the 1.4 kb *E. coli* *hphB* expression cassette replacing the full 1.3 kb *RYP1* coding region.  
120 Phenotypic analyses of  $\Delta ryp1$  mutants were performed using several independent transformed

121 strains and compared to the parental Silveira strain (WT) and one strain (1563.19) where the  
122 *RYP1* deletion construct had integrated randomly in the genome leaving the *RYP1* gene intact.

### 123 **Ryp1 is required for *Coccidioides* development**

124 Deletion of *RYP1* resulted in several *in vitro* phenotypes (Fig 1). The  $\Delta ryp1$  arthroconidia  
125 were delayed in germination, with visible colonies appearing after 7 days at 25°C on 2X GYE  
126 media while the progenitor WT and the ectopic transformed strains gave visible colonies three  
127 days after plating. The radial growth of  $\Delta ryp1$  colonies was also retarded relative to WT or ectopic  
128 transformed strains (Fig 1G) and  $\Delta ryp1$  colonies failed to grow to the edge of petri dishes (Fig 1A-  
129 D). The  $\Delta ryp1$  strains exhibited a granular phenotype at the edges of the colony (Fig 1E and F),  
130 possibly indicative of more dense conidiation. The most dramatic phenotype was observed under  
131 *in vitro* spherulation conditions: the  $\Delta ryp1$  mutant failed to differentiate into mature spherules.  
132 Instead the arthroconidia remained as thin-walled structures at all time points and by 72 hours  
133 had formed short hyphal-like segmented structures (Fig 2).

134 **Figure 1. Growth morphology of  $\Delta ryp1$  mutants.** *C. posadasii*  $\Delta ryp1$  strains exhibit a  
135 growth-limiting phenotype (A, C), in comparison to WT (B) and an ectopic transformant  
136 (D). (E) The  $\Delta ryp1$  strains have a granular phenotype. (F) Enlarged view of the  $\Delta ryp1$   
137 colony edge is shown. (A-F) All colonies were inoculated at the center of the agar media  
138 and grown at room temperature for 28 days. Representative image of each strain is shown.  
139 (G) Plugs of 6 mm were transferred from freshly growing plates to 2X GYE plates and  
140 incubated at room temperature, to measure colony radial growth. Colony diameters were  
141 measured on days 8, 14 and 20. Four independent  $\Delta ryp1$  strains (1563.4, 1563.6, 1563.7  
142 and 1563.14), as well as the WT parental strain and an ectopic transformed strain (1563.1)  
143 were tested.

144

145 **Figure 2: *C. posadasii*  $\Delta ryp1$  does not produce normal spherules *in vitro*.** Spherules  
146 of WT, a  $\Delta ryp1$  mutant and an ectopic transformed strain, grown in Converse medium at

147 37°C with 20% CO<sub>2</sub> and aliquots analyzed during *in vitro* spherulation. Images at 24 h  
148 show that while the WT and ectopic strains are rounding up to form early spherules, *Δryp1*  
149 does not form round structures. At 96 h and 120 h, the WT and ectopic strains produced  
150 mature spherules, while the *Δryp1* exhibited limited polar hyphal growth. Black bars  
151 represent 10 μm.

## 152 **Ryp1 regulates distinct sets of genes in spherules and hyphae**

153 Our previous studies revealed that *H. capsulatum* Ryp1 is required for yeast-phase growth  
154 and is responsible for the expression of the majority of yeast-phase specific genes [10]. Given  
155 that *C. posadasii* *Δryp1* mutants are defective in spherulation, we postulated that *C. posadasii*  
156 Ryp1 is also responsible for transcriptional regulation of morphology-associated genes. To this  
157 end, we performed RNA-seq to transcriptionally profile WT and *Δryp1* strains of *C. posadasii*  
158 grown under either spherulation or hyphal conditions. Under our experimental conditions, 9711  
159 transcripts were observable (transcripts per million, TPM, ≥ 10) in at least one sample. Of these,  
160 4175 transcripts (about 43% of all detected transcripts) were significantly differentially expressed  
161 (Fig 3) with at least a two-fold change in at least one of the following three comparisons: (1) a  
162 comparison of WT spherules and WT hyphae (WT<sup>Sph</sup>/WT<sup>Hy</sup>) identified 2985 transcripts that we  
163 refer to as “morphology-regulated” genes; (2) a comparison of WT vs *Δryp1* under spherule  
164 conditions identified 1742 Ryp1-dependent transcripts; and (3) a comparison of WT vs. *Δryp1*  
165 under hyphal conditions identified 925 Ryp1-dependent transcripts (Fig 3B). Not all of these Ryp-1  
166 dependent transcripts in comparisons 2 and 3 are morphology-regulated genes, and in fact, 1157  
167 morphology-regulated transcripts (39% of the 2985 WT<sup>Sph</sup>/WT<sup>Hy</sup> comparison) were dependent on  
168 Ryp1 either under spherulation or hyphal conditions. Thus, in contrast to *H. capsulatum*, over half  
169 of the morphology-regulated expression is Ryp1-independent, and Ryp1 regulates distinct sets of  
170 genes whose expression correlates with either spherule or hyphal growth conditions. To further  
171 explore the 4175 differentially expressed transcripts, we grouped them in 17 classes by

172 expression pattern (Fig 3A, S1 Table). Ryp1-dependent transcription under spherulation  
173 conditions is correlated with WT morphology-regulated transcription: spherule-enriched genes are  
174 more likely to be Ryp1-induced (class 2 in Fig 3A) while hypha-enriched genes are more likely to  
175 be Ryp1-repressed in spherules (Fig 3C and class 4 in Fig 3A). In contrast, Ryp1-dependent  
176 transcription under hyphal conditions is not correlated with morphology-regulated transcription,  
177 as can be seen from the shape of the scatter plot (Fig 3D).

178 **Figure 3. Ryp1 regulates distinct sets of genes in spherules and hyphae.** (A)

179 Heatmap showing differential expression of the 4175 genes described in the text. Genes  
180 are grouped by expression pattern (significantly up, down, or neutral in each of the three  
181 contrasts) with different classes labeled in the color bar to the right of the heatmap. The  
182 position of genes of interest in the heatmap are indicated to the right of the color bar. (B)  
183 Venn diagram of genes observed to be morphology-regulated (differentially expressed in  
184 WT<sup>Sph</sup>/WT<sup>Hy</sup>), Ryp1-dependent in spherulation conditions (differentially expressed in  
185 WT<sup>Sph</sup>/Δ*ryp1*<sup>Sph</sup>), or Ryp1-dependent in hyphal conditions (differentially expressed in  
186 WT<sup>Hy</sup>/Δ*ryp1*<sup>Hy</sup>). (C and D) Scatter plots of the differentially expressed genes comparing  
187 the WT spherule-enrichment (right) or hyphal-enrichment (left) to *ryp1*-depletion (top) or  
188 *ryp1*-enrichment (bottom) in (C) spherules or (D) hyphae. Genes in the scatter plots are  
189 colored by expression pattern, as in the color bar of (A).

190 **Ryp1 is required for the expression of a set of spherule-enriched transcripts**

191 Early subtractive cDNA hybridization experiments identified four spherule-specific genes  
192 (*ALD1*, *OPS1*, *PSP1*, and *MDR1*) [21]. Of these, we found that *ALD1* is spherule-enriched and  
193 Ryp1-independent (S1 Table, class 1) while the remaining three are both spherule-enriched and  
194 Ryp1-dependent at 37°C (S1 Table, class 2). Altogether, 406 (25%) of the 1593 transcripts that  
195 are more highly expressed in wild-type spherules versus hyphae are dependent on Ryp1 for their  
196 expression. This set includes SOWgp, the best characterized *Coccidioides* virulence factor [22]



197 and CP5G\_05265 (CIMG\_00509), a previously noted spherule enriched gene [6] at the boundary  
198 of a region of introgression between *C. immitis* and *C. posadasii* [23].

199 Intriguingly, about 5% (84 of 1593) of the spherule-enriched transcripts are more highly  
200 expressed in the  $\Delta ryp1$  mutant than WT under spherulation conditions, (S1 Table, class 3),  
201 indicating their expression is normally repressed by Ryp1 in wild-type spherules. This set includes  
202 the sulfur assimilation pathway (*MET3*, *MET14*, *MET16*, and *MET10*) required to reduce  
203 intracellular sulfate to sulfide. In contrast, we found that the downstream genes *MET5* (the beta  
204 subunit to *MET10*) and *MET17A* (which catalyzes the first step of cysteine and methionine  
205 biosynthesis) are both spherule-enriched but Ryp1-independent, while the genes acting in  
206 opposition to sulfur assimilation (both the sulfite oxidase *SOX1* and the sulfite exporter *SSU1*) are  
207 spherule-enriched and Ryp1-dependent. These data are consistent with Ryp1 regulation  
208 promoting sulfur efflux versus influx.

#### 209 **Ryp1 regulates the expression of a set of hypha-enriched transcripts**

210 Analysis of the hypha-enriched transcripts showed that about 25% of this set (351 out of  
211 1392) are Ryp1-repressed when cells are grown under spherulation conditions (S1 Table, class  
212 4). Notably, this set includes the APSES transcription factor *STU1*, which regulates hyphal  
213 morphology in *Histoplasma* [24] and has conserved hyphal enrichment in *C. immitis* [8] and all of  
214 the thermally dimorphic peizizomycetes for which RNA-seq data is available [25]. Additional genes  
215 in this set consistent with hyphal growth include 5 septins (*CDC10*, *CDC12*, *CDC3*, *ASPA*, and  
216 *ASPE*), which are cytoskeletal proteins involved in cell cycle regulation [26]. Intriguingly, 33 of the  
217 351 genes in this set are also Ryp1-dependent under hyphal growth conditions. In particular, the  
218 *Coccidioides* ortholog of the OefC transcription factor, which confers a “fluffy” phenotype in  
219 *Aspergillus nidulans* when overexpressed [27], exhibits this Ryp1-dependent regulation in hyphae.  
220 Furthermore, about 12% (164 of the 1392) of the hypha-enriched transcripts are found to be Ryp1-  
221 dependent under hyphal-promoting conditions (S1 Table, class 5). This set includes the stress  
222 response gene *DDR48/MS95*, which is highly enriched in *Histoplasma* hyphae [28], as well as

223 both *DIT2*, an enzyme involved in the production of N,N-bisformyl dityrosine, and the bisformyl  
224 dityrosine transporter *DTR1*. In *Saccharomyces cerevisiae*, bisformyl dityrosine is a major building  
225 block of the protective ascospore cell wall, whose assembly depends on both *DIT2* [29] and *DTR1*  
226 [30]. These Ryp1-dependent hypha-enriched genes also include many enzymes with NADH  
227 cofactors, including two (*CodA* and *AifA*) with roles in the response to reductive stress [31,32].  
228 Taken together, our results suggest that Ryp1 has a dual role in *Coccidioides* development,  
229 regulating the expression of subsets of both spherule- and hypha-enriched genes.

### 230 **Ryp1 regulates expression of morphology- or temperature-independent transcripts**

231 In *Histoplasma*, Ryp1 directly interacts with two other transcriptional regulators, Ryp2 and  
232 Ryp3, to regulate yeast-phase growth [11]. The orthologs of *RYP2* and *RYP3* in *Coccidioides* are  
233 not differentially regulated in wild-type spherules and hyphae; however, *RYP2* displays a Ryp1-  
234 dependent expression pattern under spherulation conditions (S1 Table, class 6). In addition, 282  
235 transcripts show a similar morphology-independent but Ryp1-dependent expression pattern  
236 under spherulation conditions, including the cytosolic catalase *CATP*, the tyrosinase *TYR2*, as  
237 well as ~40 genes involved in primary carbohydrate, nucleotide, and amino acid metabolism. An  
238 additional 75 transcripts display a morphology-independent but Ryp1-dependent expression  
239 pattern under both spherule- and hypha-promoting conditions (S1 Table, class 7). Among these  
240 genes are *MEP1*, a protease that contributes to immune evasion via degradation of SOWgp [33];  
241 urease (*CPSG\_08438*), a known virulence factor of *Coccidioides* [34]; *UAZ1*, a uricase that  
242 catalyzes the first step in the breakdown of uric acid; and *CTR2*, a copper transporter observed  
243 to be spherule-enriched in *C. immitis*.

244 In addition to the Ryp1-dependent transcripts, there are 432 transcripts that are  
245 equivalently expressed in WT spherules and hyphae but are upregulated in  $\Delta ryp1$  mutants  
246 compared to wild-type under spherulation conditions (S1 Table, class 8), suggesting that Ryp1  
247 represses their expression. This set includes *LAE1*, a master regulator of secondary metabolism  
248 [35]; orthologs of the *Aspergillus* developmental regulators NsdD (*NSD4*) and F1bC (*FBC1*); the

249 MAPK pathway components *STE11*, *PBS2*, and *SDP1*; and the histidine kinase PhkB (*PHK2*). In  
250 *Histoplasma*, *PHKB* shares a Ryp1-associated divergent promoter with the histidine kinase *PHKA*,  
251 and both genes are Ryp1-induced in *Histoplasma* yeast [11]. In *Coccidioides*, these genes  
252 likewise share a divergent promoter, and have correlated expression profiles, but the differential  
253 expression of *PHKA* is too modest to pass our 2-fold change criterion.

## 254 **A significant portion of the morphology-regulated genes are expressed independently of** 255 **Ryp1**

256 In addition to the spherule-enriched genes that were regulated by Ryp1, there was a  
257 significant portion of spherule-enriched genes that were independent of Ryp1. In fact, of 1593  
258 transcripts that are upregulated in wild-type spherules compared to hyphae, 62% of them (1002  
259 transcripts) show Ryp1-independent expression patterns (S1 Table, class 1). Notably, these  
260 include genes involved in regulation of morphology: *XBP1*, an APSES transcription factor  
261 enriched in *Histoplasma* yeast [24], *SSK1* and *SKN7*, response regulators required for  
262 *Histoplasma* yeast morphology (Beyhan et al, unpublished), the redox related genes *TSA1* and  
263 *NIR1*, and *HPD1*, which has previously been noted as a morphology related gene in *Coccidioides*  
264 [6,9] and *Paracoccidioides* [36]. Similarly, among 1392 hypha-enriched transcripts, 62% (862  
265 transcripts) are Ryp1-independent in our dataset (S1 Table, class 9). These include five enzymes  
266 of gluconeogenesis (*PCK1*, *GAPDH (TDH1)*, *TPI1*, and *FBP1*), as well as genes related in  
267 glutamate import, amino acid catabolism, peptidase activity, and protein complex disassembly --  
268 all consistent with hyphae utilizing proteins as a primary carbon source. Notably, *PYC2*, the first  
269 enzyme of gluconeogenesis, is both enriched in hyphae and Ryp1-repressed in spherules.

## 270 **RYP1 deletion mutants are avirulent**

271 The critical role of Ryp1 in spherule formation and gene regulation suggested that it may  
272 be either reduced in virulence, or avirulent, *in vivo*. To test this, we assessed the virulence of the  
273  $\Delta ryp1$  strain using the mouse model of coccidioidomycosis in C57BL/6 mice. Twelve mice were  
274 intranasally infected with 50 or 1,000 arthroconidia of  $\Delta ryp1$  strain 1563.7 and disease

275 progression was compared to infection with 50 WT arthroconidia or 4,400  $\Delta cps1$  spores which  
276 were previously shown to be avirulent [19]. Fungal burden in the lungs and spleen as well as  
277 survival was monitored for 28 days post-infection. Additionally, two mice from each group were  
278 sacrificed after 12 days for histopathological studies. The WT-infected mice all became moribund  
279 and were euthanized between day 12 and 19, while all  $\Delta ryp1$  and  $\Delta cps1$ -infected mice survived  
280 to day 28. Lung and spleen homogenates did not yield *Coccidioides* colony-forming units (CFUs)  
281 from infections with the  $\Delta ryp1$  and  $\Delta cps1$  mice, consistent with an inability of these mutant strains  
282 to survive *in vivo*. In a follow-up experiment, four additional  $\Delta ryp1$  strains were screened for  
283 virulence along with an ectopic transformed line (Fig 4). As in the first experiment,  $\Delta ryp1$ -infected  
284 mice, which received between 525 and 1133 arthroconidia, survived for the full duration of the 28-  
285 day study (Fig 4). In contrast, seven of eight mice infected with 52 spores of the ectopically  
286 integrated *RYP1* deletion construct or infected with 49 WT spores died by day 17. One mouse in  
287 each of these two groups survived for 28 days but had significant pulmonary disease and  
288 dissemination and would have ultimately succumbed to the infection. As we observed previously,  
289 there was no growth of *Coccidioides* from the lungs or spleens of the  $\Delta ryp1$ -infected mice. The  
290 mean lung CFUs of the mice infected with ectopic strain 1563.1 were  $2.87 \times 10^7$  (range  $1.24 \times$   
291  $10^5$ -  $4.7 \times 10^7$ ), and for those infected with WT were  $1.31 \times 10^7$  (range  $1.06 \times 10^5$ –  $4.8 \times 10^7$ ), with  
292 dissemination to the spleens in all mice as reflected by spleen CFUs.

293 **Figure 4: Infection of mice with *C. posadasii*  $\Delta ryp1$ .** Survival results for C57BL/6 mice  
294 (N=8 mice/group) infected intranasally with four independent  $\Delta ryp1$  strains, 1563.7 (circle),  
295 1563.10 (square), 1563.14 (inverted triangle) and 1563.15 (triangle), one ectopic *ryp1*-  
296 transformed strain, 1563.1 (half-filled circle) and WT (half-filled square). The  $\Delta ryp1$  strains  
297 were infected at between 525 and 1133 arthroconidia, while 50 arthroconidia of the ectopic  
298 stain and WT were used.

299

300  **$\Delta ryp1$  mutants do not provide protection against WT infection**

301 Due to the failure of  $\Delta ryp1$  to cause disease or persist in the lungs of C57BL/6 mice, the  
302  $\Delta ryp1$  strain was tested to determine whether it provides protective immunity against subsequent  
303 WT infection, as is the case for the  $\Delta cps1$  strain. The  $\Delta cps1$  vaccine strain and the  $\Delta ryp1$  strain  
304 1563.7 were used to vaccinate C57BL/6 mice either intraperitoneally (IP) or subcutaneously (SC)  
305 as described previously [19]. Mice were vaccinated, boosted after two weeks, challenged four  
306 weeks later with 90 WT arthroconidia, and sacrificed two weeks later. While  $\Delta cps1$  provided  
307 dramatic protection by either SC or IP vaccination, resulting in a 5-log lower lung fungal burden  
308 than mice vaccinated with a control adjuvant, vaccination with  $\Delta ryp1$  resulted in no reduction in  
309 lung fungal burden and thus, no protection (Fig 5). Mice in the control group had a mean lung  
310 fungal burden of  $5.3 \times 10^6$  CFU, which was similar to that of the  $\Delta ryp1$  SC-vaccinated mice  
311 ( $P < 0.05$ ) which had mean lung fungal burdens of  $4.1 \times 10^6$  CFU and the  $\Delta ryp1$  IP-vaccinated mice  
312 with an average of  $6.4 \times 10^6$  CFU per lung. In contrast, the  $\Delta cps1$ -vaccinated mice had mean lung  
313 fungal burdens of 341 CFU for the IP-vaccinated group and 84 CFU for the SC-vaccinated group.  
314 -Furthermore, when whole spleens were plated for fungal growth, those from  $\Delta cps1$ -vaccinated  
315 mice were almost fully free of fungi, with only one spleen of a single  $\Delta cps1$  IP-vaccinated mouse  
316 having a small area of growth, likely from a single spherule, appearing seven days after plating,  
317 while the control mice and  $\Delta ryp1$ -vaccinated mice all grew *Coccidioides* by three days after  
318 plating. Thus it is clear that the  $\Delta ryp1$  strain does not provide protective immunity against  
319 *Coccidioides* infection.

320 **Figure 5: Vaccination of mice with *C. posadasii*  $\Delta ryp1$  mutant.** Protection results for  
321 C57BL/6 mice vaccinated with either  $\Delta cps1$ ,  $\Delta ryp1$  or a *S. cerevisiae* culture supernatant  
322 (Control). C57BL/6 mice (N=8 mice/group) were injected either by intraperitoneal (IP) or  
323 subcutaneous (SC) injection twice 2 weeks apart with  $\Delta cps1$ ,  $\Delta ryp1$ , or Control.  
324 Vaccinated mice were challenged with a lethal dose of WT (90 spores) and total lung  
325 CFUs were determined 14 days post-infection.  $\Delta cps1$  significantly protects mice from *C.*

326 *posadasii* infection compared to Control (P<0.004 both comparisons) while  $\Delta ryp1$  shows  
327 no protection (P=0.99 vs. control). Bar equals geometric mean.

## 328 Discussion

329 Spherulation is a critical step of pathogenesis in *Coccidioides* infection, allowing the  
330 fungus to adapt to growth within the host and producing endospores which allow expansion and  
331 dissemination of the fungus. Here we identified the first transcription factor that is essential for the  
332 process of *Coccidioides* spherulation by interrogating the function of Ryp1, a conserved  
333 transcriptional regulator that plays a critical role in fungal development and virulence in many  
334 fungi, including *Histoplasma*, a close relative of *Coccidioides*. Our results showed that as in  
335 *Histoplasma*, Ryp1 is required for development of the host parasitic form; namely spherules in  
336 *Coccidioides* and yeast-phase cells in *Histoplasma*. Additionally, in *Coccidioides*, we  
337 demonstrated that Ryp1 is absolutely required for virulence in the mouse model of infection,  
338 consistent with its critical role in spherulation. The  $\Delta ryp1$  strain failed to differentiate into spherules  
339 *in vitro* and failed to persist in susceptible B6 mice, producing no symptoms of disease or viable  
340 propagules at 28 days post-infection, even when exposed to 10-20X the level of spores that  
341 results in a lethal infection for WT strains. Interestingly, in contrast to *Histoplasma*, where Ryp1  
342 is required for the differential expression of the vast majority of yeast-enriched transcripts, there  
343 were a significant number of spherule-enriched genes whose expression was Ryp1-independent,  
344 indicating that other transcription factors likely function in parallel to Ryp1 to regulate spherule  
345 development. Additionally, *Coccidioides* Ryp1 is required for normal rates of radial growth of  
346 hyphal colonies and regulates the expression of a subset of hypha-enriched transcripts. Thus  
347 *Coccidioides* Ryp1 has a dual role in both the environmental form and the host form of the fungus  
348 where it regulates gene expression and development.

349 The contrast between *Histoplasma* and *Coccidioides* Ryp1 should be interpreted in the  
350 light of the evolutionary relationship between *Histoplasma* and *Coccidioides*--although both are  
351 thermally dimorphic fungal pathogens in the order Onygenales, *Histoplasma* is a member of the



352 family Ajellomycetaceae, which also includes the thermally dimorphic pathogens  
353 *Paracoccidioides*, *Blastomyces*, and *Emergomyces*, consistent with a single origin of dimorphism  
354 in this family. In contrast, *Coccidioides* is the only known dimorphic member of the family  
355 Onygenaceae, and has a unique dimorphic pattern, forming endosporulating spherules during  
356 host invasion vs. the more typical hyphal to yeast phase transition. This evolutionary relationship  
357 suggests that dimorphism of *Histoplasma* and *Coccidioides* evolved separately, and that some  
358 regulatory mechanisms may be shared whereas others are distinct. In *Histoplasma*, since Ryp1  
359 is required for the vast majority of yeast-enriched expression, identifying Ryp-dependent genes  
360 by expression analysis of WT vs *ryp1* mutants did not further refine the set of yeast-enriched  
361 transcripts defined by comparing the gene expression program of wild-type *Histoplasma* yeast  
362 and hyphae [10]. In contrast, only 25% of spherule-enriched transcripts were dependent on  
363 *Coccidioides* Ryp1, thereby suggesting that these genes may be key to spherule development  
364 and virulence, both of which are defective in the absence of Ryp1. Further identification of key  
365 effectors of *Coccidioides* spherulation and virulence could come from future studies identifying  
366 direct targets of Ryp1, which was useful in identifying virulence factors in *Histoplasma* [11].

367 Transcriptome differences between *Coccidioides* spherules and hyphae have previously  
368 been profiled using RNA-seq in both *C. posadasii* and *C. immitis* [6,8,37]. In our dataset, about  
369 30% of the detectable transcripts were differentially regulated between *C. posadasii* spherules  
370 and hypha. While there is not a complete overlap with other studies, likely due to differences in  
371 growth conditions and stage of spherule development, most of the previously observed highly  
372 regulated genes are also differentially regulated in our dataset. For example, SOWgp, the best  
373 characterized virulence factor of *Coccidioides* [22], is spherule-enriched in all datasets, and we  
374 observe its expression to be Ryp1-dependent. Among the shared hypha-enriched genes in all  
375 datasets, *STU1*, an APSES transcription factor that is a regulator of hyphal growth in *Histoplasma*  
376 [24], is Ryp1-repressed in spherules, underscoring the importance of Ryp1 for the expression of  
377 morphology-specific genes.

378

379 SOWgp, one of the most highly enriched spherule-specific transcripts, is an important  
380 component of the *Coccidioides* spherule outer wall (SOW) layer [22]. This lipid-rich layer shed by  
381 spherules has been shown to reduce fungicidal activity of neutrophils towards arthroconidia and  
382 to promote disseminated disease [38]. The SOW lipids are composed of phospholipids and  
383 sphingolipids, with the major sphingolipids being sphingosine and ceramide [38]. In this study, we  
384 found that PilA and NCE102, two key factors for assembling eisosomes, punctate membrane  
385 associated structures involved in regulating lipid metabolism in response to stress, are enriched  
386 in spherules in a Ryp1-dependent manner. Given that eisosomes have a positive role in regulating  
387 sphingolipid synthesis [39], and that CPSG\_03079, which is orthologous to the ceramide synthase  
388 BarA [40], is likewise spherule-enriched and Ryp1-dependent, it is plausible that Ryp1 may  
389 regulate production of SOW lipids in spherules.

390 The transcriptome profiling presented here showed that Ryp1 is responsible for inducing  
391 the expression of some spherule-enriched genes and repressing the expression of some hypha-  
392 enriched genes. Intriguingly, in addition to these sets of genes, there are other sets of spherule-  
393 enriched genes that are not regulated by Ryp1 under spherulation conditions, but are regulated  
394 by Ryp1 under hypha-promoting conditions. For example, *RYP4*, which is a major regulator of  
395 yeast growth in *Histoplasma*, is only regulated by Ryp1 under hyphal conditions. Here we found  
396 that *RYP4* is spherule-enriched in *C. posadasii*, as was also shown in *C. immitis* [8]. However,  
397 unlike *Histoplasma*, where *RYP4* expression under yeast-promoting conditions is directly  
398 regulated by Ryp1 [11], *RYP4* expression is independent of Ryp1 under spherulation conditions,  
399 but dependent on Ryp1 under hyphal conditions (S1 Table, class 10). An additional 67 genes  
400 share this expression pattern, including *ACH1*, which is required for detoxification of acetate in *S.*  
401 *cerevisiae* [43] and propionate in *A. fumigatus* [44]. Coexpression of *RYP4* and *ACH1* is notable,  
402 given the role of the *RYP4* ortholog FacB in regulation of acetate metabolism in *Aspergillus* [45].



403 The potential role of Ryp4 in regulating acetate utilization or morphological transitions in  
404 *Coccidioides* will be determined by future studies.

405 In this study, we also explored the role of Ryp1 in pathogenesis using the murine model  
406 of coccidioidomycosis. Our results show that Ryp1 is essential for *in vivo* growth and colonization;  
407 however, it does not confer protection to the host, unlike the previously characterized  $\Delta cps1$   
408 mutant. Intriguingly, the  $\Delta cps1$  mutant is able to convert to spherules but is impaired in  
409 development of mature spherules and endospores [19], whereas the morphology of the  $\Delta ryp1$   
410 mutant *in vivo* is not yet known. Given its morphology defect *in vitro*, we predict that the  $\Delta ryp1$   
411 mutant may not be able to convert to spherules *in vivo*, and thus may not display spherule-specific  
412 antigens that are required to elicit a protective host response. Consequently, comparison of the  
413  $\Delta ryp1$  and  $\Delta cps1$  mutants may narrow the search for the molecules responsible for the protective  
414 effect of the  $\Delta cps1$  mutant. Furthermore, while the  $\Delta ryp1$  mutant may not be a good vaccine  
415 candidate, Ryp1 and other proteins that are required for spherule growth may be effective targets  
416 for the development of therapeutics that inhibit the transition from arthroconidia to spherules *in*  
417 *vivo*. Additionally, elucidation of the Ryp1 regulon as described here identifies key downstream  
418 effectors that are essential for the development and virulence of the host form of *Coccidioides*,  
419 and thus also serve as valuable diagnostic and therapeutic targets.

420

## 421 **Materials and Methods**

### 422 **Strains and growth conditions**

423 Wild-type *Coccidioides posadasii* (strain Silveira, ATCC 28868) was cultured on 2X GYE medium  
424 (2% glucose, 1% yeast extract, and 1.5% agar) at room temperature (approximately 24°C).  
425 Mutant strains were selected and maintained on 2X GYE media supplemented with 50 mg/ml of  
426 hygromycin, also at room temperature as described previously [19]. Arthroconidia of WT and  
427 mutant strains were harvested from 4 week-old cultures, using sterile water by the mini-stir bar  
428 method described previously [46] and stored in sterile water at 4°C. Spore numbers were

429 determined with a hemocytometer and viable counts by serial dilution and plating. All  
430 manipulations of viable cultures were performed at biosafety level 3 (BSL3). Spherules were  
431 prepared by growth in a modified Converse medium at 38°C with 20% CO<sub>2</sub>, with shaking at 180  
432 rpm for 48 hours. To measure colonial radial growth and assess colony morphology, 6 mm plugs  
433 of actively growing cultures were transferred to 2X GYE agar plates using transfertubes  
434 (Transfertube® Disposable Harvesters, Spectrum® Laboratories,) and grown at room temperature.

#### 435 **Creation of *RYP1* gene deletion mutants**

436 A gene replacement cassette for the *C. posadasii* strain Silveira *RYP1* gene (CPSG\_00528) was  
437 constructed using double-joint PCR [47]. DNA fragments of 1.2kb (5' 1192 and 3' 1233)  
438 representing the 5' and 3'flanking sequences of CPSG\_00528 were amplified by PCR with  
439 oligonucleotide primer combinations OAM1153/OAM1154, and OAM1155/OAM1156,  
440 respectively (Table S3). The hygromycin resistance gene (*E. coli hphB*) was amplified with  
441 primers OAM597/OAM598. These three amplicons were then recombined by double-joint PCR  
442 as described [47]. The extension product was amplified by PCR with the nested primers  
443 OAM1159/OAM1160 which contain *Bam*HI restriction sites added at the ends. This product was  
444 cloned into pGEM®-T Easy (Promega) and the insert in plasmid AM1538 was sequenced to verify  
445 the construct. The gene replacement cassette was cloned as a *Bam*HI fragment into AM1145,  
446 the binary vector for *Agrobacterium tumefaciens* transformation [48], creating AM1563. AM1563  
447 was transformed into *A. tumefaciens* strain AD965. *C. posadasii* strain Silveira was transformed  
448 with AD965/AM1563 as previously described [48] and hygromycin resistant strains selected and  
449 passaged three times to get homokaryons, prior to molecular analysis. Gene replacement strains  
450 and ectopic insertion transformants were identified by Southern hybridization analysis as  
451 described previously [48], or by PCR. For PCR analysis, primers OAM597 and OAM598 were  
452 used to confirm the presence of the *hphB* gene in all transformants. Primers OAM1611 located  
453 upstream of the *RYP1* locus and OAM431 of the *hphB* gene were used to detect a homologous  
454 integration event of the transforming construct at the 5' end of *RYP1*, and primers OAM1612

455 located downstream of the *RYP1* locus along with OAM432 were used to detect homologous  
456 integration of the transforming construct at the 3' end of *RYP1*. For initial experiments including  
457 *in vitro* growth,  $\Delta ryp1$  strains 1563.1, 1563.4, 1563.7 and 1563.14 were used along with ectopic  
458 transformed line 1563.19, where the *RYP1* deletion construct was integrated elsewhere in the  
459 genome. For mouse virulence and protection studies,  $\Delta ryp1$  strain 1563.7 was used. For further  
460 experiments to validate mouse virulence results, an additional set of strains were used;  $\Delta ryp1$   
461 strains 1563.7, 1563.10, 1563.14 and 1563.15 and ectopic transformed strain 1563.1.

#### 462 **RNA-seq library preparation and sequencing**

463 For expression studies, total RNAs were isolated from WT and  $\Delta ryp1$  hyphal and spherule  
464 cultures. Duplicate hyphal cultures of each strain were grown by inoculation of  $5 \times 10^7$   
465 arthroconidia into 100 ml of 2X GYE and then incubated with shaking at 180 rpm for 48 h at 28°C.  
466 Spherule cultures of WT and  $\Delta ryp1$  were also grown in duplicate by inoculating 100 ml of modified  
467 Converse liquid medium with  $3 \times 10^8$  arthroconidia and growing them at 38°C with 20% CO<sub>2</sub>, with  
468 shaking at 180 rpm for 48 h [49]. RNAs were isolated using a modified acid-phenol preparation  
469 as described previously [49] with the modification that liquid N<sub>2</sub> grinding was used to initially  
470 disrupt the cells. RNAs were resuspended in diethyl pyrocarbonate-treated dH<sub>2</sub>O prior to  
471 assessment of their quality and concentration with an Agilent Bioanalyzer (Agilent Technologies,  
472 Palo Alto, CA).

473 RNA-seq libraries were prepared as previously described [25]. Briefly, for the isolation of  
474 mRNAs, five µg total RNA from each sample was subjected to poly-A purification using  
475 Dynabeads Oligo (dT)<sub>25</sub> (Invitrogen-ThermoFisher). RNA libraries were prepared using NEBNext  
476 Ultra Directional RNA Library Prep Kit (NEB). Quality of the total RNA, mRNA and library was  
477 confirmed using Bioanalyzer (Agilent). Sequencing was done in-house at UCSF Center for  
478 Advanced Technology using Illumina HiSeq2500 instruments. 11 to 19 million single-end 50 bp  
479 reads were obtained for each sample.

480

## 481 **RNA-seq data analysis**

482 Predicted mRNA sequences for *Coccidioides posadasii* Silveira were downloaded from  
483 the Broad Institute on 3/18/2015  
484 ([http://www.broadinstitute.org/annotation/genome/coccidioides\\_group/MultiDownloads.html](http://www.broadinstitute.org/annotation/genome/coccidioides_group/MultiDownloads.html))  
485 [23,50].

486 Relative abundances (reported as TPM values [51]) and estimated counts (est\_counts) of  
487 each transcript in each sample were estimated by alignment free comparison of k-mers between  
488 the preprocessed reads and mRNA sequences using KALLISTO version 0.46.0 [52]. Further  
489 analysis was restricted to transcripts with TPM  $\geq 10$  in at least one sample.

490 Differentially expressed genes were identified by comparing replicate means for contrasts  
491 of interest using LIMMA version 3.30.8 [53,54]. Genes were considered significantly differentially  
492 expressed if they were statistically significant (at 5% FDR) with an effect size of at least 2x  
493 (absolute log<sub>2</sub> fold change  $\geq 1$ ) for a given contrast.

## 494 **Murine virulence and protection studies**

495 To assess the pathogenicity of  $\Delta ryp1$  mutants, 8-week old female C57BL/6 mice (B6) were  
496 anesthetized with ketamine/xylazine and infected intranasally (IN) as previously described [55].  
497 Briefly, 8-10 mice per group were challenged with 50 or 1000 spores of the  $\Delta ryp1$  mutant strains.  
498 As a control, B6 mice were given 50 WT spores, and in some studies, B6 mice were infected with  
499 50 spores of a transformed line with an ectopic insertion of the *RYP1* gene deletion construct.

500 The potential for  $\Delta ryp1$  strains to protect mice from subsequent infection by WT was  
501 assessed by performing vaccination experiments as described for  $\Delta cps1$  [19]. Six-week old B6  
502 mice were primed with  $2.5 \times 10^4$   $\Delta ryp1$  (strain 1563.7) arthroconidia either by intraperitoneal (IP)  
503 or subcutaneous (SC) injection of spores in groups of eight mice and two weeks later boosted

504 with the same number of spores. Two other groups of mice were used as a positive control for  
505 vaccination by being vaccinated in a similar manner with  $\Delta cps1$  arthroconidia, at a dose of  $5 \times$   
506  $10^4$  spores. As a control, mice were vaccinated with a *S. cerevisiae* culture supernatant, which  
507 was previously used as an adjuvant for a chimeric protein antigen that shows some vaccine  
508 protection for *Coccidioides* [56]. Mice were challenged four weeks later with 90 WT arthroconidia  
509 and sacrificed two weeks later for lung fungal burden determination. Spleens were cultured whole  
510 to determine dissemination [56]. All murine infections and handling were carried out at animal  
511 BSL3 facility and all procedures with mice were approved by the University of Arizona Institutional  
512 Animal Care and Use Committee. Animals were housed and cared for according to PHS  
513 standards.

#### 514 **Other software and libraries**

515 We wrote custom scripts and generated plots in Prism (GraphPad Software, San Diego,  
516 CA), R 3.3.3 [57] and Python 2.7.13, using Numpy 1.12.1 [58] and Matplotlib 2.0.0 [59]. Jupyter  
517 4.2.3 [60] notebooks and JavaTreeView 1.1.6r4 [61] were used for interactive data exploration.

#### 518 **Data Availability**

519 All relevant data are contained within the paper and/or Supporting Information files. For  
520 high-throughput sequencing data, the raw data are available at the NCBI Gene Expression  
521 Omnibus (GEO) databases under GEO accession GSE178277.

522

#### 523 **Supporting Data**

524 **S1 Table. Table of Kallisto quantification, limma statistics, and annotations for**  
525 **differentially expressed genes.** Excel-compatible tab-delimited text conforming to  
526 JavaTreeView extended CDT format. Each row is a transcript with the UNIQID column giving the  
527 Broad Cp Silveira systematic gene name. The NAME column gives manually curated short gene  
528 names, transferred from *Histoplasma capsulatum* G217B (HcG217B, GenBank  
529 GCA\_017607445.1) augmented with *Coccidioides*-specific gene names. The next three columns

530 give limma BH-adjusted p-values for differential expression in each of the three contrasts. The  
531 next 8 columns give kallisto estimated counts for each sample. The next 8 columns give kallisto  
532 normalized abundances (TPMs) for each sample. Cp\_GenBank and Cp\_anno give the GenBank  
533 Cp Silveira accession and annotation respectively. CiRS, CiRS\_GenBank, and Ci\_anno give the  
534 Broad systematic gene name, GenBank accession, and annotation respectively for the  
535 InParanoid-mapped *C. immitis* RS ortholog. HcG217B, HcG217B\_anno, and  
536 HcG217B\_GenBank give the GSC systematic gene name and annotation (from Voorhies et al,  
537 submitted) and GenBank accession for the InParanoid-mapped HcG217B ortholog.  
538 Cp\_new\_GenBank gives the GenBank accession for the corresponding gene in the newly  
539 available Cp Silveira assembly and annotation (BioProject PRJNA664774) [62]. Class indicates  
540 the differential expression pattern, as referenced in the results and discussion sections.  
541 BGCOLOR gives the hex code for the class coloring in Fig 3. GWEIGHT is a place-holder column  
542 for JavaTreeView compatibility. The final three columns give the limma fit values for the three  
543 contrasts plotted in Fig 3.

544 **S2 Table. Table of Kallisto quantification, limma statistics, and annotations for all**  
545 **expressed genes.** Excel-compatible tab-delimited text conforming to JavaTreeView extended  
546 CDT format. Columns are exactly as for S1 Table, but rows include all 9711 analyzed genes. The  
547 estimated counts in this file are sufficient to recapitulate the limma analysis.

548 **S3 Table. Table of oligonucleotides used for  $\Delta ryp1$  mutant creation and analysis.**

549

550 **Acknowledgements:** We thank members of the Beyhan, Galgiani, Orbach, and Sil labs for  
551 helpful discussions.

552

553

554 **References**

555 1. Johnson L, Gaab EM, Sanchez J, Bui PQ, Nobile CJ, Hoyer KK, et al. Valley fever: danger  
556 lurking in a dust cloud. *Microbes Infect.* 2014;16: 591–600.

557 2. Centers for Disease Control and Prevention (CDC). Increase in reported  
558 coccidioidomycosis--United States, 1998-2011. *MMWR Morb Mortal Wkly Rep.* 2013;62:  
559 217–221.

560 3. Sil A, Andrianopoulos A. Thermally Dimorphic Human Fungal Pathogens--Polyphyletic  
561 Pathogens with a Convergent Pathogenicity Trait. *Cold Spring Harb Perspect Med.* 2014;5:  
562 a019794.

563 4. Cole GT, Sun SH. Arthroconidium-Spherule-Endospore Transformation in *Coccidioides*  
564 *immitis*. *Fungal Dimorphism.* 1985. pp. 281–333. doi:10.1007/978-1-4684-4982-2\_12

565 5. Cole GT, Hung CY. The parasitic cell wall of *Coccidioides immitis*. *Med Mycol.* 2001;39  
566 Suppl 1: 31–40.

567 6. Whiston E, Zhang Wise H, Sharpton TJ, Jui G, Cole GT, Taylor JW. Comparative  
568 transcriptomics of the saprobic and parasitic growth phases in *Coccidioides* spp. *PLoS*  
569 *One.* 2012;7: e41034.

570 7. Johannesson H, Kasuga T, Schaller RA, Good B, Gardner MJ, Townsend JP, et al. Phase-  
571 specific gene expression underlying morphological adaptations of the dimorphic human  
572 pathogenic fungus, *Coccidioides posadasii*. *Fungal Genet Biol.* 2006;43: 545–559.

573 8. Carlin AF, Beyhan S, Peña JF, Stajich JE, Viriyakosol S, Fierer J, et al. Transcriptional  
574 Analysis of *Coccidioides immitis* Mycelia and Spherules by RNA Sequencing. *Journal of*

- 575 Fungi. 2021. doi:10.3390/jof7050366
- 576 9. Viriyakosol S, Singhania A, Fierer J, Goldberg J, Kirkland TN, Woelk CH. Gene expression  
577 in human fungal pathogen *Coccidioides immitis* changes as arthroconidia differentiate into  
578 spherules and mature. *BMC Microbiol.* 2013;13: 1–1.
- 579 10. Nguyen VQ, Sil A. Temperature-induced switch to the pathogenic yeast form of  
580 *Histoplasma capsulatum* requires Ryp1, a conserved transcriptional regulator. *Proceedings*  
581 *of the National Academy of Sciences.* 2008;105: 4880.
- 582 11. Beyhan S, Gutierrez M, Voorhies M, Sil A. A Temperature-Responsive Network Links Cell  
583 Shape and Virulence Traits in a Primary Fungal Pathogen. *PLoS Biol.* 2013;11: e1001614.
- 584 12. Lohse MB, Zordan RE, Cain CW, Johnson AD. Distinct class of DNA-binding domains is  
585 exemplified by a master regulator of phenotypic switching in *Candida albicans*. *Proc Natl*  
586 *Acad Sci U S A.* 2010;107: 14105–14110.
- 587 13. Michielse CB, Becker M, Heller J, Moraga J, Collado IG, Tudzynski P. The *Botrytis cinerea*  
588 Reg1 protein, a putative transcriptional regulator, is required for pathogenicity,  
589 conidiogenesis, and the production of secondary metabolites. *Mol Plant Microbe Interact.*  
590 2011;24: 1074–1085.
- 591 14. Jonkers W, Dong Y, Broz K, Kistler HC. The Wor1-like protein Fgp1 regulates  
592 pathogenicity, toxin synthesis and reproduction in the phytopathogenic fungus *Fusarium*  
593 *graminearum*. *PLoS Pathog.* 2012;8: e1002724.
- 594 15. Brown DW, Busman M, Proctor RH. *Fusarium verticillioides* SGE1 is required for full  
595 virulence and regulates expression of protein effector and secondary metabolite  
596 biosynthetic genes. *Mol Plant Microbe Interact.* 2014;27: 809–823.



- 597 16. Michielse CB, van Wijk R, Reijnen L, Manders EMM, Boas S, Olivain C, et al. The nuclear  
598 protein Sge1 of *Fusarium oxysporum* is required for parasitic growth. *PLoS Pathog.* 2009;5:  
599 e1000637.
- 600 17. Srikantha T, Borneman AR, Daniels KJ, Pujol C, Wu W, Seringhaus MR, et al. TOS9  
601 regulates white-opaque switching in *Candida albicans*. *Eukaryot Cell.* 2006;5: 1674–1687.
- 602 18. Zordan RE, Galgoczy DJ, Johnson AD. Epigenetic properties of white–opaque switching in  
603 *Candida albicans* are based on a self-sustaining transcriptional feedback loop. *Proceedings*  
604 *of the National Academy of Sciences.* 2006;103: 12807.
- 605 19. Narra HP, Shubitz LF, Mandel MA, Trinh HT, Griffin K, Buntzman AS, et al. A *Coccidioides*  
606 *posadasii* CPS1 Deletion Mutant Is Avirulent and Protects Mice from Lethal Infection. *Infect*  
607 *Immun.* 2016;84: 3007–3016.
- 608 20. Abuodeh RO, Orbach MJ, Mandel MA, Das A, Galgiani JN. Genetic transformation of  
609 *Coccidioides immitis* facilitated by *Agrobacterium tumefaciens*. *J Infect Dis.* 2000;181:  
610 2106–2110.
- 611 21. Delgado N, Hung CY, Tarcha E, Gardner MJ, Cole GT. Profiling gene expression in  
612 *Coccidioides posadasii*. *Med Mycol.* 2004;42: 59–71.
- 613 22. Hung C-Y, Yu J-J, Seshan KR, Reichard U, Cole GT. A parasitic phase-specific adhesin of  
614 *Coccidioides immitis* contributes to the virulence of this respiratory Fungal pathogen. *Infect*  
615 *Immun.* 2002;70: 3443–3456.
- 616 23. Neafsey DE, Barker BM, Sharpton TJ, Stajich JE, Park DJ, Whiston E, et al. Population  
617 genomic sequencing of *Coccidioides* fungi reveals recent hybridization and transposon  
618 control. *Genome Res.* 2010;20: 938–946.

- 619 24. Longo LVG, Ray SC, Puccia R, Rappleye CA. Characterization of the APSES-family  
620 transcriptional regulators of *Histoplasma capsulatum*. *FEMS Yeast Res.* 2018;18: 991.
- 621 25. Rodriguez L, Voorhies M, Gilmore S, Beyhan S, Myint A, Sil A. Opposing signaling  
622 pathways regulate morphology in response to temperature in the fungal pathogen  
623 *Histoplasma capsulatum*. *PLoS Biol.* 2019;17: e3000168.
- 624 26. Gladfelter AS. Control of filamentous fungal cell shape by septins and formins. *Nat Rev*  
625 *Microbiol.* 2006;4: 223–229.
- 626 27. Lee B-Y, Han S-Y, Choi HG, Kim JH, Han K-H, Han D-M. Screening of growth- or  
627 development-related genes by using genomic library with inducible promoter in *Aspergillus*  
628 *nidulans*. *J Microbiol.* 2005;43: 523–528.
- 629 28. Gilmore SA, Voorhies M, Gebhart D, Sil A. Genome-Wide Reprogramming of Transcript  
630 Architecture by Temperature Specifies the Developmental States of the Human Pathogen  
631 *Histoplasma*. *PLoS Genet.* 2015;11: e1005395.
- 632 29. Briza P, Eckerstorfer M, Breitenbach M. The sporulation-specific enzymes encoded by the  
633 *DIT1* and *DIT2* genes catalyze a two-step reaction leading to a soluble LL-dityrosine-  
634 containing precursor of the yeast spore wall. *Proc Natl Acad Sci U S A.* 1994;91: 4524–  
635 4528.
- 636 30. Felder T, Bogengruber E, Tenreiro S, Ellinger A, Sá-Correia I, Briza P. Dtrlp, a multidrug  
637 resistance transporter of the major facilitator superfamily, plays an essential role in spore  
638 wall maturation in *Saccharomyces cerevisiae*. *Eukaryot Cell.* 2002;1: 799–810.
- 639 31. Thön M, Al Abdallah Q, Hortschansky P, Scharf DH, Eisendle M, Haas H, et al. The  
640 CCAAT-binding complex coordinates the oxidative stress response in eukaryotes. *Nucleic*  
641 *Acids Res.* 2010;38: 1098–1113.

- 642 32. Savoldi M, Malavazi I, Soriani FM, Capellaro JL, Kitamoto K, da Silva Ferreira ME, et al.  
643 Farnesol induces the transcriptional accumulation of the *Aspergillus nidulans* Apoptosis-  
644 Inducing Factor (AIF)-like mitochondrial oxidoreductase. *Mol Microbiol.* 2008;70: 44–59.
- 645 33. Hung C-Y, Seshan KR, Yu J-J, Schaller R, Xue J, Basrur V, et al. A metalloproteinase of  
646 *Coccidioides posadasii* contributes to evasion of host detection. *Infect Immun.* 2005;73:  
647 6689–6703.
- 648 34. Mirbod-Donovan F, Schaller R, Hung C-Y, Xue J, Reichard U, Cole GT. Urease produced  
649 by *Coccidioides posadasii* contributes to the virulence of this respiratory pathogen. *Infect*  
650 *Immun.* 2006;74: 504–515.
- 651 35. Bayram O, Braus GH. Coordination of secondary metabolism and development in fungi: the  
652 velvet family of regulatory proteins. *FEMS Microbiol Rev.* 2012;36: 1–24.
- 653 36. Nunes LR, Costa de Oliveira R, Leite DB, da Silva VS, dos Reis Marques E, da Silva  
654 Ferreira ME, et al. Transcriptome analysis of *Paracoccidioides brasiliensis* cells undergoing  
655 mycelium-to-yeast transition. *Eukaryot Cell.* 2005;4: 2115–2128.
- 656 37. Mead HL, Roe CC, Higgins Keppler EA, Van Dyke MCC, Laux KL, Funke AL, et al.  
657 Defining Critical Genes During Spherule Remodeling and Endospore Development in the  
658 Fungal Pathogen, *Coccidioides posadasii*. *Front Genet.* 2020;11: 483.
- 659 38. Peláez-Jaramillo CA, Jiménez-Alzate MDP, Araque-Marin P, Hung C-Y, Castro-Lopez N,  
660 Cole GT. Lipid Secretion by Parasitic Cells of Contributes to Disseminated Disease. *Front*  
661 *Cell Infect Microbiol.* 2021;11: 592826.
- 662 39. Lanze CE, Gandra RM, Foderaro JE, Swenson KA, Douglas LM, Konopka JB. Plasma  
663 Membrane MCC/Eisosome Domains Promote Stress Resistance in Fungi. *Microbiol Mol*  
664 *Biol Rev.* 2020;84. doi:10.1128/MMBR.00063-19

- 665 40. Li S, Du L, Yuen G, Harris SD. Distinct ceramide synthases regulate polarized growth in the  
666 filamentous fungus *Aspergillus nidulans*. *Mol Biol Cell*. 2006;17: 1218–1227.
- 667 41. Hwang LH, Mayfield JA, Rine J, Sil A. Histoplasma requires SID1, a member of an iron-  
668 regulated siderophore gene cluster, for host colonization. *PLoS Pathog*. 2008;4: e1000044.
- 669 42. Yuan WM, Gentil GD, Budde AD, Leong SA. Characterization of the *Ustilago maydis* sid2  
670 gene, encoding a multidomain peptide synthetase in the ferrichrome biosynthetic gene  
671 cluster. *J Bacteriol*. 2001;183: 4040–4051.
- 672 43. Fleck CB, Brock M. Re-characterisation of *Saccharomyces cerevisiae* Ach1p: fungal CoA-  
673 transferases are involved in acetic acid detoxification. *Fungal Genet Biol*. 2009;46: 473–  
674 485.
- 675 44. Fleck CB, Brock M. Characterization of an acyl-CoA: carboxylate CoA-transferase from  
676 *Aspergillus nidulans* involved in propionyl-CoA detoxification. *Mol Microbiol*. 2008;68: 642–  
677 656.
- 678 45. Todd RB, Kelly JM, Davis MA, Hynes MJ. Molecular characterization of mutants of the  
679 acetate regulatory gene *facB* of *Aspergillus nidulans*. *Fungal Genet Biol*. 1997;22: 92–102.
- 680 46. Huppert M, Sun SH, Gross AJ. Evaluation of an experimental animal model for testing  
681 antifungal substances. *Antimicrob Agents Chemother*. 1972;1: 367–372.
- 682 47. Yu J-H, Hamari Z, Han K-H, Seo J-A, Reyes-Domínguez Y, Scazzocchio C. Double-joint  
683 PCR: a PCR-based molecular tool for gene manipulations in filamentous fungi. *Fungal*  
684 *Genet Biol*. 2004;41: 973–981.
- 685 48. Kellner EM, Orsborn KI, Siegel EM, Mandel MA, Orbach MJ, Galgiani JN. *Coccidioides*  
686 *posadasii* contains a single 1,3-beta-glucan synthase gene that appears to be essential for

- 687 growth. *Eukaryot Cell*. 2005;4: 111–120.
- 688 49. Mandel MA, Galgiani JN, Kroken S, Orbach MJ. *Coccidioides posadasii* contains single  
689 chitin synthase genes corresponding to classes I to VII. *Fungal Genet Biol*. 2006;43: 775–  
690 788.
- 691 50. Sharpton TJ, Stajich JE, Rounsley SD, Gardner MJ, Wortman JR, Jordar VS, et al.  
692 Comparative genomic analyses of the human fungal pathogens *Coccidioides* and their  
693 relatives. *Genome Res*. 2009;19: 1722–1731.
- 694 51. Li B, Dewey CN. RSEM: accurate transcript quantification from RNA-Seq data with or  
695 without a reference genome. *BMC Bioinformatics*. 2011;12: 323.
- 696 52. Bray NL, Pimentel H, Melsted P, Pachter L. Near-optimal probabilistic RNA-seq  
697 quantification. *Nat Biotechnol*. 2016;34: 525–527.
- 698 53. Ritchie ME, Phipson B, Wu D, Hu Y, Law CW, Shi W, et al. limma powers differential  
699 expression analyses for RNA-sequencing and microarray studies. *Nucleic Acids Res*.  
700 2015;43: e47.
- 701 54. Smyth GK. Linear models and empirical bayes methods for assessing differential  
702 expression in microarray experiments. *Stat Appl Genet Mol Biol*. 2004;3: Article3.
- 703 55. Shubitz L, Peng T, Perrill R, Simons J, Orsborn K, Galgiani JN. Protection of mice against  
704 *Coccidioides immitis* intranasal infection by vaccination with recombinant antigen 2/PRA.  
705 *Infect Immun*. 2002;70: 3287–3289.
- 706 56. Shubitz LF, Yu J-J, Hung C-Y, Kirkland TN, Peng T, Perrill R, et al. Improved protection of  
707 mice against lethal respiratory infection with *Coccidioides posadasii* using two recombinant  
708 antigens expressed as a single protein. *Vaccine*. 2006;24: 5904–5911.

- 709 57. R Core Team. R: A language and environment for statistical computing, v3.3.3. R  
710 Foundation for Statistical Computing, Vienna, Austria. 2021 [cited 2021]. Available:  
711 <https://www.r-project.org/>
- 712 58. van der Walt S, Colbert SC, Varoquaux G. The NumPy Array: A Structure for Efficient  
713 Numerical Computation. *Computing in Science Engineering*. 2011;13: 22–30.
- 714 59. Hunter. Matplotlib: A 2D Graphics Environment. *Computing in Science & Engineering*.  
715 2007;9: 90–95.
- 716 60. Perez F, Granger BE. IPython: A System for Interactive Scientific Computing. *Computing in*  
717 *Science Engineering*. 2007;9: 21–29.
- 718 61. Saldanha AJ. Java Treeview--extensible visualization of microarray data. *Bioinformatics*.  
719 2004;20: 3246–3248.
- 720 62. de Melo Teixeira M, Stajich JE, Sahl JW, Thompson GR, Blackmon AV, Mead HL, et al. A  
721 chromosomal-level reference genome of the widely utilized *Coccidioides posadasii*  
722 laboratory strain “Silveira.” *bioRxiv*. 2021. p. 2021.05.19.444813.  
723 doi:10.1101/2021.05.19.444813
- 724

Mandel et al. Figure 1

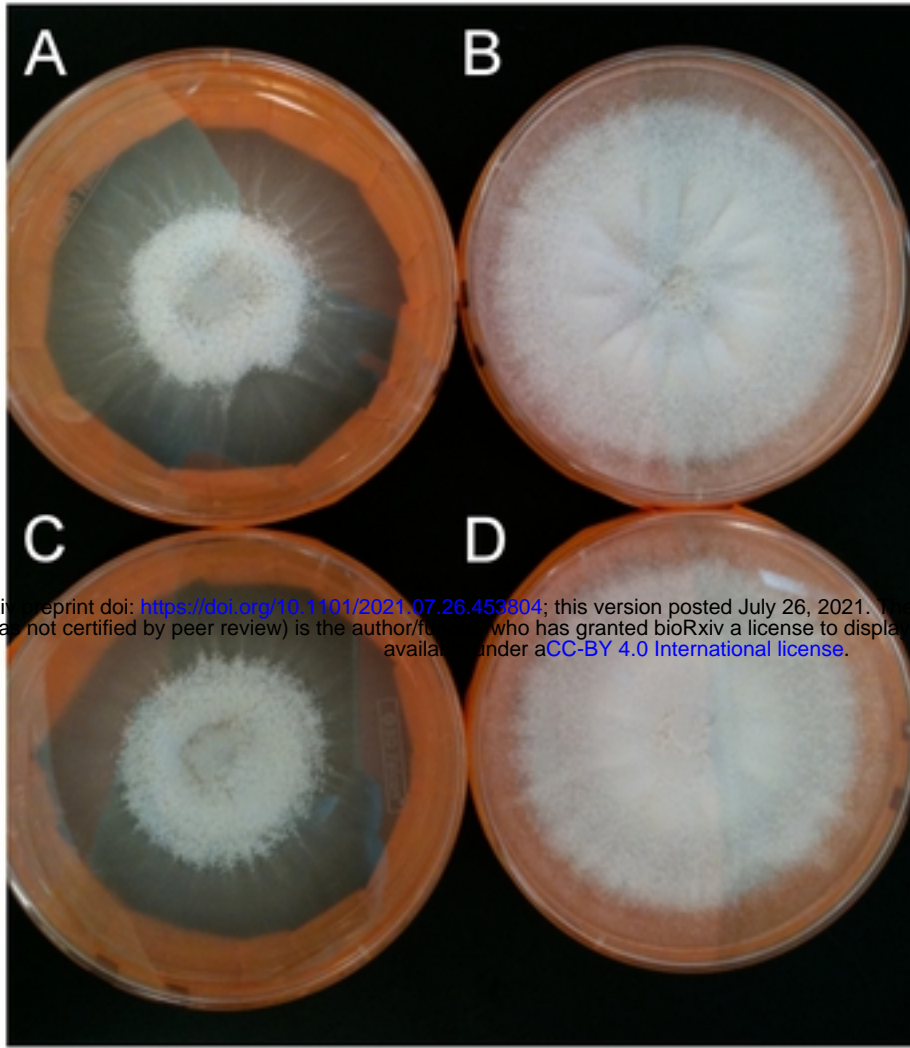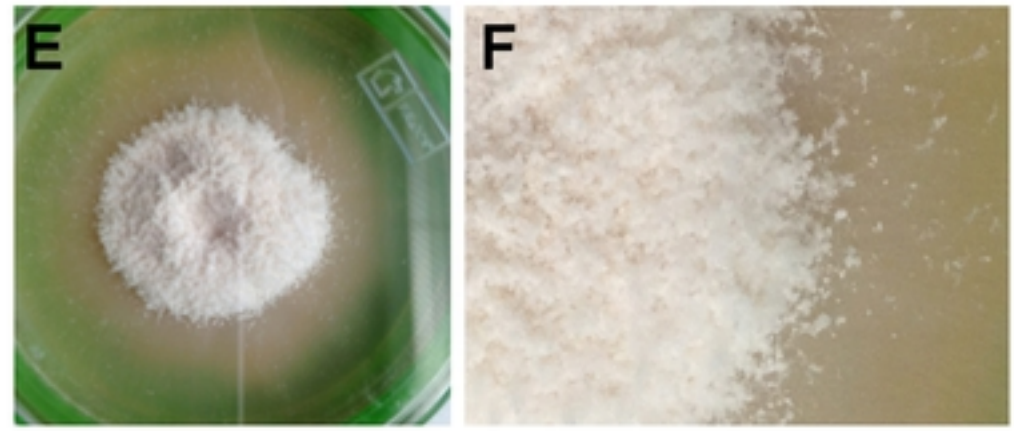

bioRxiv preprint doi: <https://doi.org/10.1101/2021.07.26.453904>; this version posted July 26, 2021. The copyright holder for this preprint (which was not certified by peer review) is the author/funder, who has granted bioRxiv a license to display the preprint in perpetuity. It is made available under aCC-BY 4.0 International license.

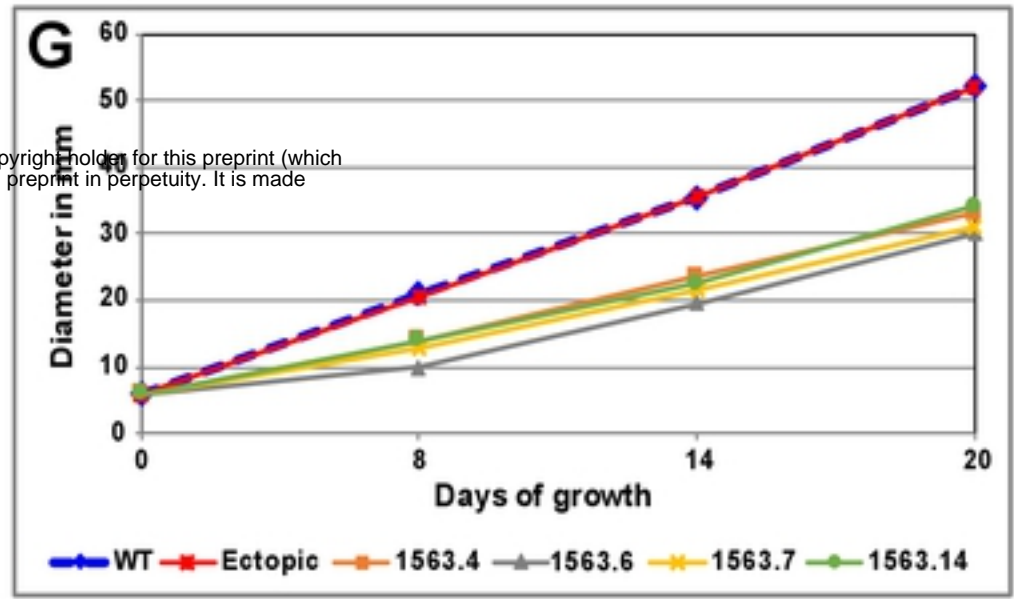



# Mandel et al. Figure 2

bioRxiv preprint doi: <https://doi.org/10.1101/2021.07.26.453804>; this version posted July 26, 2021. The copyright holder for this preprint (which was not certified by peer review) is the author/funder, who has granted bioRxiv a license to display the preprint in perpetuity. It is made available under aCC-BY 4.0 International license.

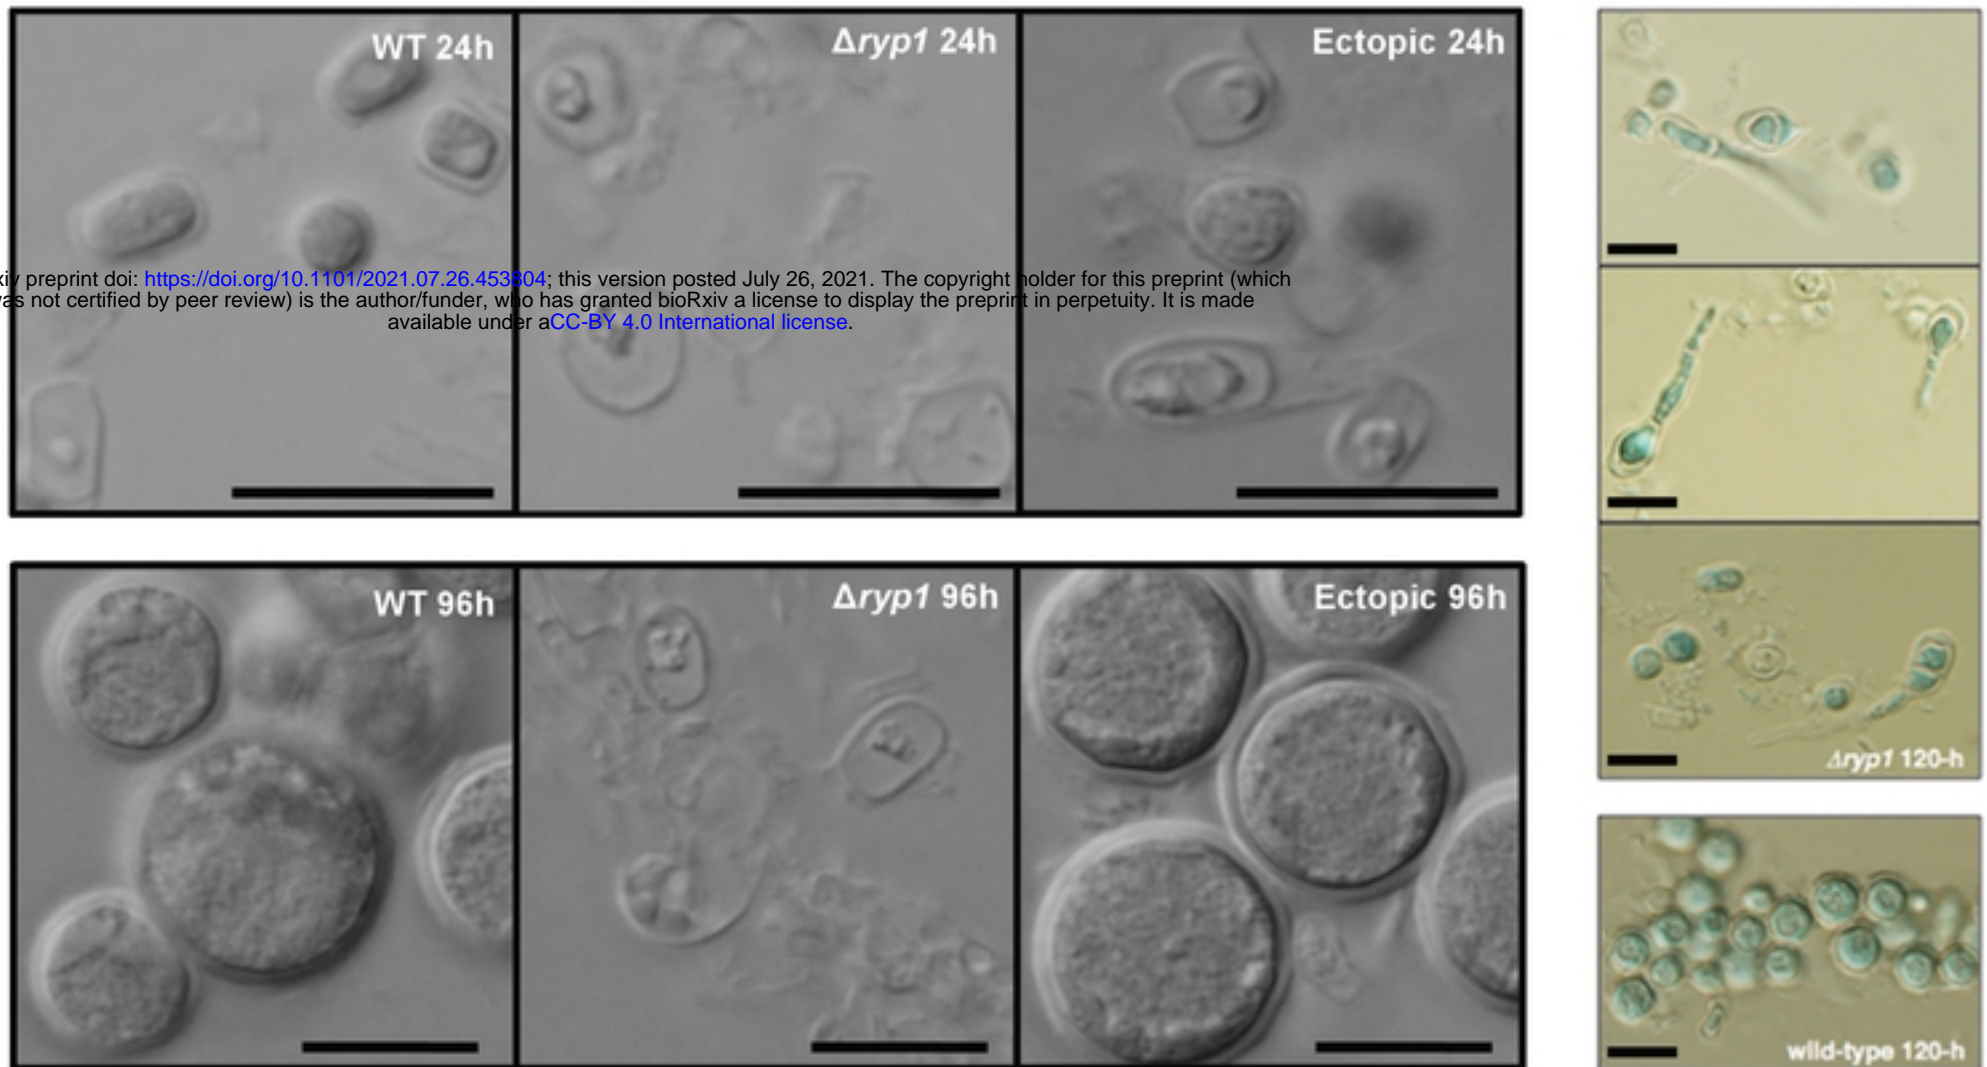



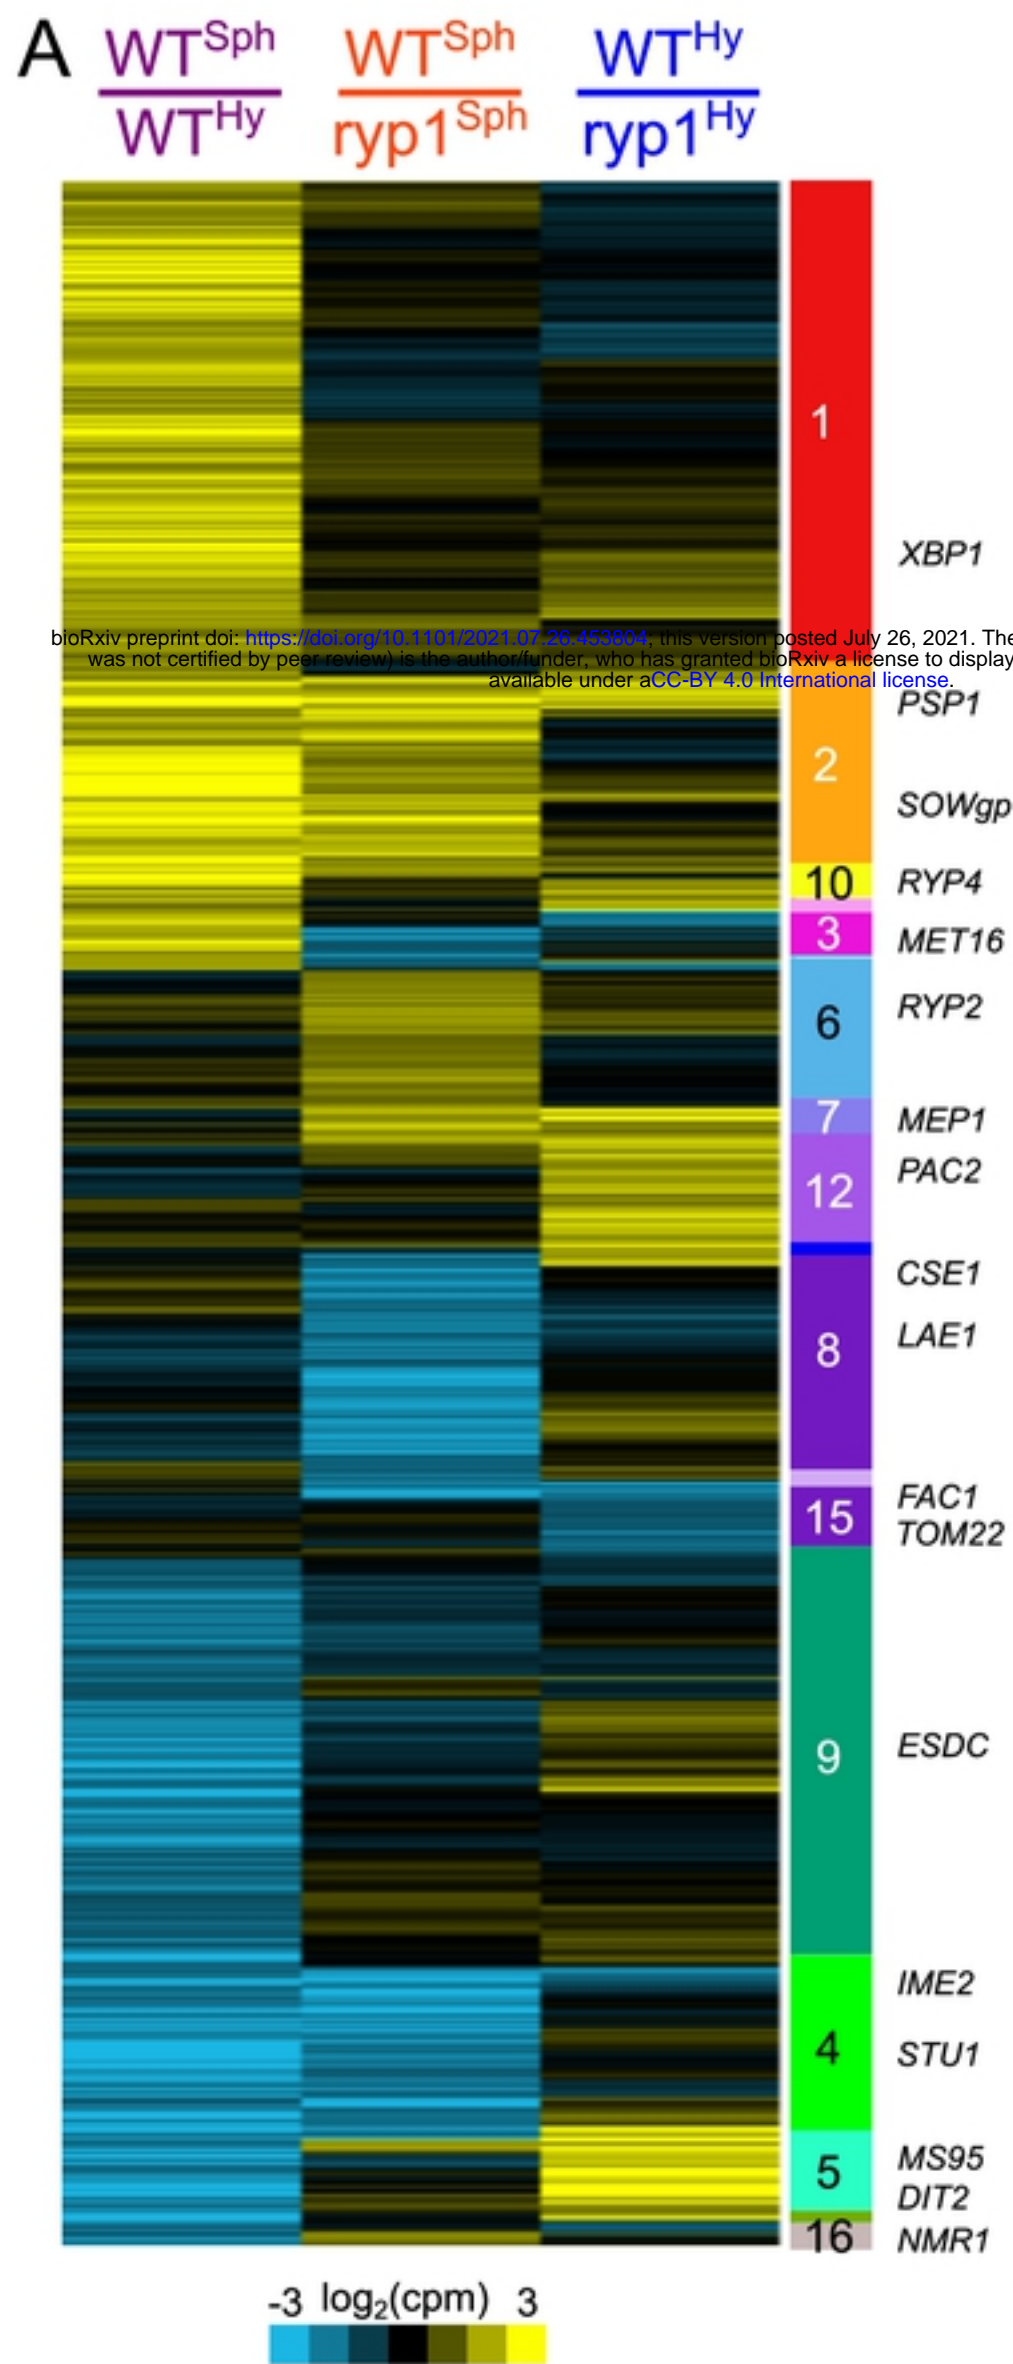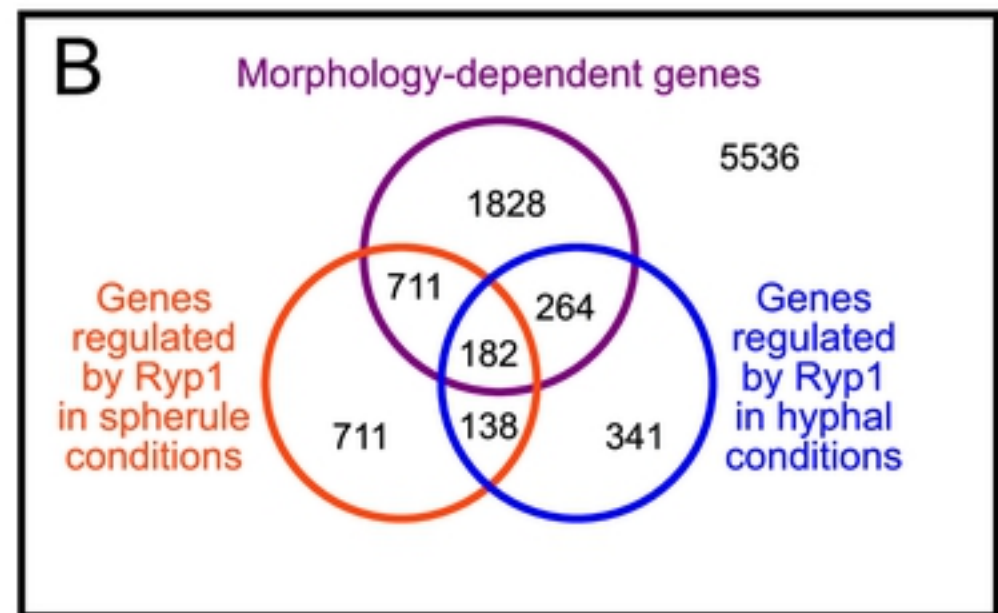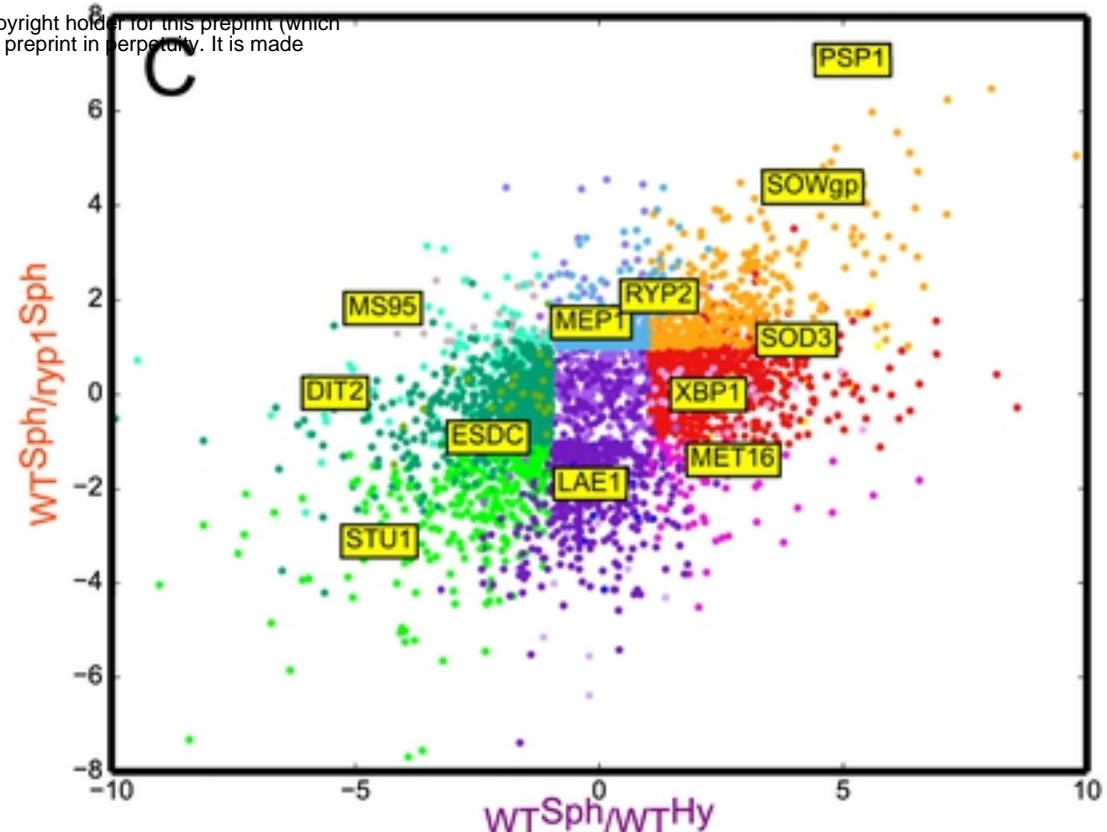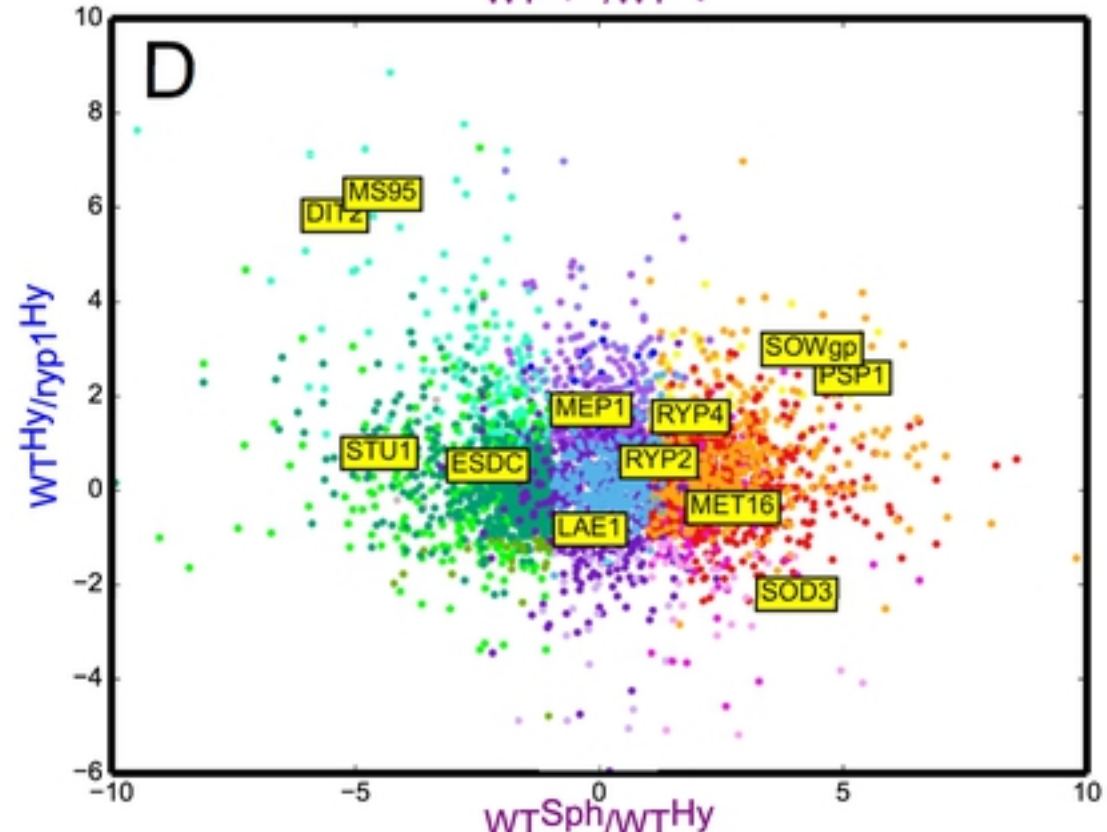

bioRxiv preprint doi: <https://doi.org/10.1101/2021.07.26.453804>; this version posted July 26, 2021. The copyright holder for this preprint (which was not certified by peer review) is the author/funder, who has granted bioRxiv a license to display the preprint in perpetuity. It is made available under aCC-BY 4.0 International license.

Mandel et al. Figure 4

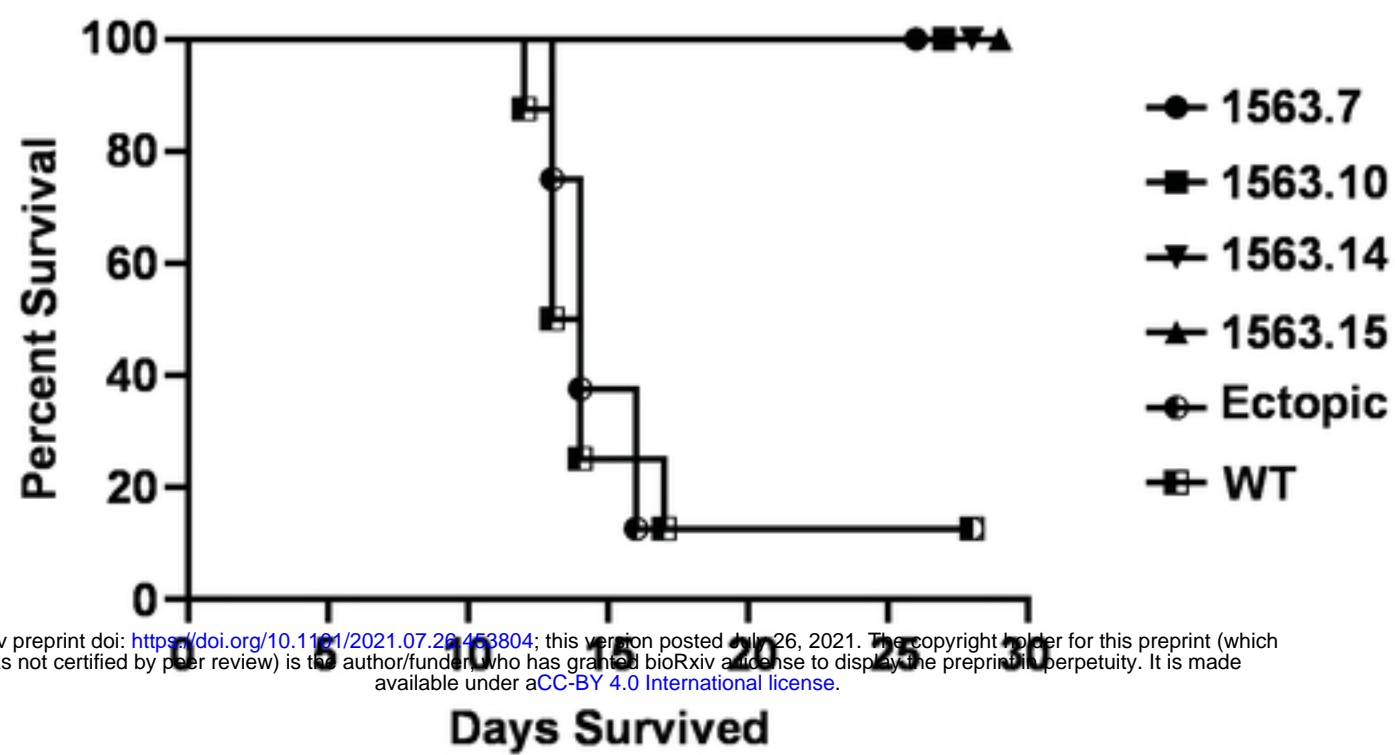

bioRxiv preprint doi: <https://doi.org/10.1101/2021.07.26.463804>; this version posted July 26, 2021. The copyright holder for this preprint (which was not certified by peer review) is the author/funder, who has granted bioRxiv a license to display the preprint in perpetuity. It is made available under aCC-BY 4.0 International license.

# Mandel et al. Figure 5

bioRxiv preprint doi: <https://doi.org/10.1101/2021.07.26.453804>; this version posted July 26, 2021. The copyright holder for this preprint (which was not certified by peer review) is the author/funder, who has granted bioRxiv a license to display the preprint in perpetuity. It is made available under aCC-BY 4.0 International license.

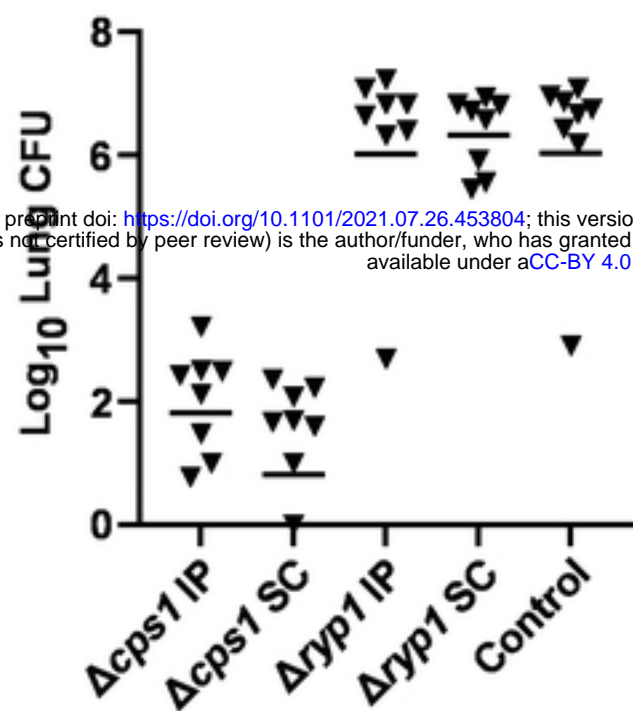

Source: http://biorxiv.org/content/10.1101/2021.07.26.453804v1.full.pdf
